# Supplementary material
Source: PubMed Central journal article supplement (PMC8052998)
Supplement: AET2-5-e10504-s001.pdf [file AET2-5-e10504-s001.pdf]

# Data Supplement S1

## Supportive Parenting Proposal

- 1) Pregnant residents will not be scheduled for nights or rotations requiring 28 hour call during the first 12 weeks of pregnancy and from week 27 and beyond, unless they would like to be scheduled for nights/call during these periods.

*Mark only one oval.*

I support

I oppose

2. Comments on #1

---

---

---

---

---

- 2) All new parents may designate 6 weeks within the first 12 weeks after delivery for flexible scheduling. The chiefs will then attempt to accommodate all reasonable requests. Examples of reasonable requests: Shorter strings of shifts, splitting up night shifts, no shifts on a certain week day. Examples of unreasonable requests: No weekends, no nights, no holidays, all journal clubs off.

*Mark only one oval.*

I support

I oppose

4. Comments on #2

---

---

---

---

---

---

This content is neither created nor endorsed by Google.

Google Forms
